# Supplementary material for: Bioprinting Decellularized Breast Tissue for the Development of Three-Dimensional Breast Cancer Models
Source: PubMed Central journal article supplement (PMC9264314; doi:10.1021/acsami.2c00920), 2022-06-23
Supplement: am2c00920_si_001.pdf [file am2c00920_si_001.pdf]

# Bioprinting Decellularized Breast Tissue for the Development of 3D Breast Cancer Models

*Barbara Blanco-Fernandez\**, *Sergi Rey-Vinolas*, *Gülsün Bağcı*, *Gerard Rubi-Sans*, *Jorge Otero*,  
*Daniel Navajas*, *Soledad Perez-Amodio*, *Elisabeth Engel\**

## EXPERIMENTAL SECTION

*Collagen quantification.* 100  $\mu\text{L}$  of dry TDM resuspended in milliQ water or a standard of Collagen type 1 were incubated with 100  $\mu\text{L}$  of HCl 12 M for 3 h at 120 °C. Then, the water was evaporated at 60 °C. Once evaporated, the pellet was resuspended in 100  $\mu\text{L}$  of milliQ water, spin at 13,200 rpm 10 min and 30  $\mu\text{L}$  of the supernatant of each sample were added to a 96-well plate. Then, 70  $\mu\text{L}$  of a diluent (66.7% 2-propranolol in milliQ water) were added to each well. Afterwards, 50  $\mu\text{L}$  of the oxidant solution was mixed and incubated for 5 min (Chloramine-T hydrate 1.573%, sodium acetate trihydrate 4.75%, sodium citrate tribasic dihydrate 3.56%, citric acid monohydrate 0.46%, 2-Propanol 33.32%, in milliQ water). Finally, 125  $\mu\text{L}$  Color reagent was incorporated (4-(Dimethylamine) benzaldehyde 10.18%, perchloric acid 13.02%, 2-propanol 84.78%, in milliQ water), mixed and incubated at 70 °C 15 min. The absorbance at 550 nm was recorded, and the amount of collagen was calculated with the corresponding calibration curve and normalized by the weight of TDM used.

## SUPPLEMENTARY TABLES

**Table S1.** Composition (%) and young modulus (E) of the hydrogels tested in the mechanical properties.

| Bioink                          | TDM | GelMA | Alginate | Coll | Irgacure | Cross-linking                  | E (kPa)     |
|---------------------------------|-----|-------|----------|------|----------|--------------------------------|-------------|
| <i>T2_G2.5_A0.5 (TGA)</i>       | 2   | 2.5   | 0.5      | -    | 0.1      | 37 °C + CaCl <sub>2</sub> +UV  | 4.15 ± 0.66 |
| <i>T2_G2.5_A0.5_Coll (TGAC)</i> | 2   | 2.5   | 0.5      | 0.15 | 0.1      | 37 °C + CaCl <sub>2</sub> + UV | 4.22 ± 1.02 |
| <i>T2</i>                       | 2   | -     | -        | -    | -        | 37 °C                          | 0.63 ± 0.15 |
| <i>T3</i>                       | 3   | -     | -        | -    | -        | 37 °C                          | 1.08 ± 0.24 |
| <i>A0.5</i>                     | -   | -     | 0.5      | -    | -        | CaCl <sub>2</sub>              | 2.96 ± 1.29 |
| <i>G2.5</i>                     | -   | 2.5%  | -        | -    | 0.1      | UV                             | 0.95 ± 0.69 |
| <i>G2.5_A0.5</i>                | -   | 2.5%  | 0.5      | -    | 0.1      | 37 °C + CaCl <sub>2</sub>      | 2.82 ± 0.52 |
| <i>G2.5_A0.5_Coll</i>           | -   | 2.5%  | 0.5      | 0.15 | 0.1      | 37 °C + CaCl <sub>2</sub> + UV | 2.15 ± 0.17 |
| <i>T2_A0.5</i>                  | 2   | -     | 0.5      | -    | -        | 37 °C + CaCl <sub>2</sub>      | 3.67 ± 0.59 |
| <i>T2_A1</i>                    | 2   | -     | 1        | -    | -        | 37 °C + CaCl <sub>2</sub>      | 5.97 ± 0.80 |

**Table S2.** Primers used in RT-qPCR.

| Gene            |         | Sequence                      |
|-----------------|---------|-------------------------------|
| <i>HSP90AA1</i> | Forward | 5'-TCCTGTGCGGTCACTTAGC -3'    |
|                 | Reverse | 5'-AAGGCGAACGTCTCAACCTC -3'   |
| <i>HSP90AB1</i> | Forward | 5'- GGGACTGTCTGGGTATCGGAA-3'  |
|                 | Reverse | 5'- AAGGCAAAAGTCTCCACCTCC-3'  |
| <i>ABCC1</i>    | Forward | 5'-CCATCCACGACCCTAATCCC -3'   |
|                 | Reverse | 5'-ACTTGTTCCGACGTGTCCTC -3'   |
| <i>KCNA1</i>    | Forward | 5'-AAAGACGACCTGCCGCATT-3'     |
|                 | Reverse | 5'-CCTTCTAAGCTCCCACCAGG-3'    |
| <i>CACNA1G</i>  | Forward | 5'-CGAGATCAGCCTCCCACCTTT-3'   |
|                 | Reverse | 5'-CTCAGCTAGAGGGATCTGTGGG-3'  |
| <i>ABCG2</i>    | Forward | 5'-GACTTATGTTCCACGGGCCT -3'   |
|                 | Reverse | 5'-GGCTCTATGATCTCTGTGGCTTT-3' |
| <i>FNI</i>      | Forward | 5'-CCAGGCAGTACAATGTGGGT -3'   |
|                 | Reverse | 5'-TGGAATAGAGCTCCCAGGCT -3'   |
| <i>COL1A1</i>   | Forward | 5'-GGAATGAAGGGACACAGAGGTT -3' |
|                 | Reverse | 5'- AGTAGCACCATCATTTCCACGA-3' |

**Table S3.** Cell viability of MCF-7 cells in bioprinted TGA and TGAC hydrogels and non-bioprinted Coll hydrogels after 1 day in culture.

| <i>Hydrogel type</i> | <i>Viability (%)</i> |
|----------------------|----------------------|
| <i>TGA</i>           | 60.02 ± 9.87         |
| <i>TGAC</i>          | 65.51 ± 10.80        |
| <i>Coll</i>          | 70.05 ± 8.16         |

**SUPPLEMENTARY FIGURES**

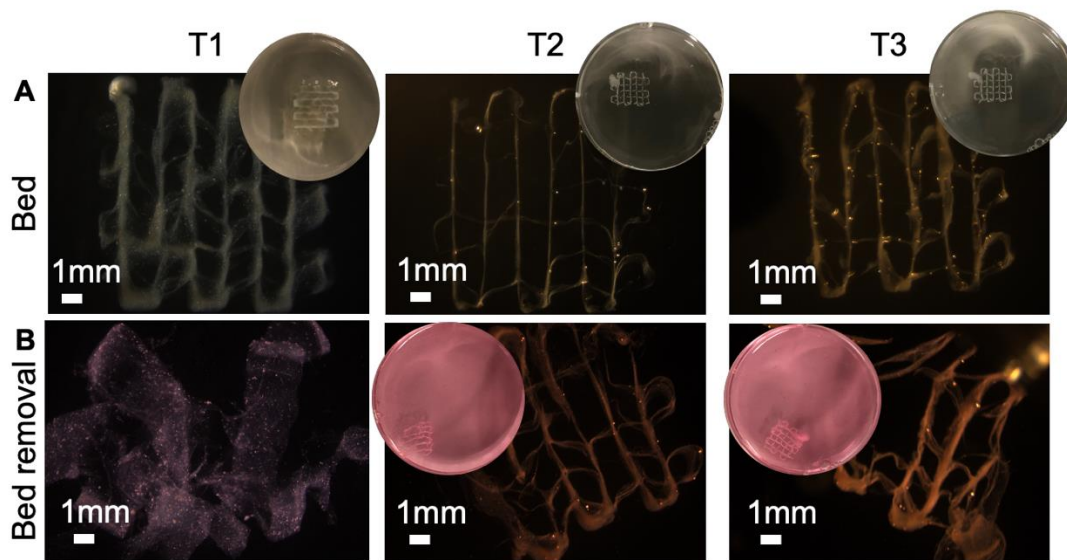

**Figure S1.** TDM bioprinting at different concentrations (10 mg/ml, 20 mg/mL and 30 mg/mL) containing  $10^6$  cells/mL of MCF-7 cells. (A) Cell-laden hydrogels bioprinted in a bed of Pluronic F127 at 23% (scale bar 1 mm). (B) Bioprinted cell-laden hydrogels after the bedding removal with several washes of cold PBS (scale bar 1 mm).

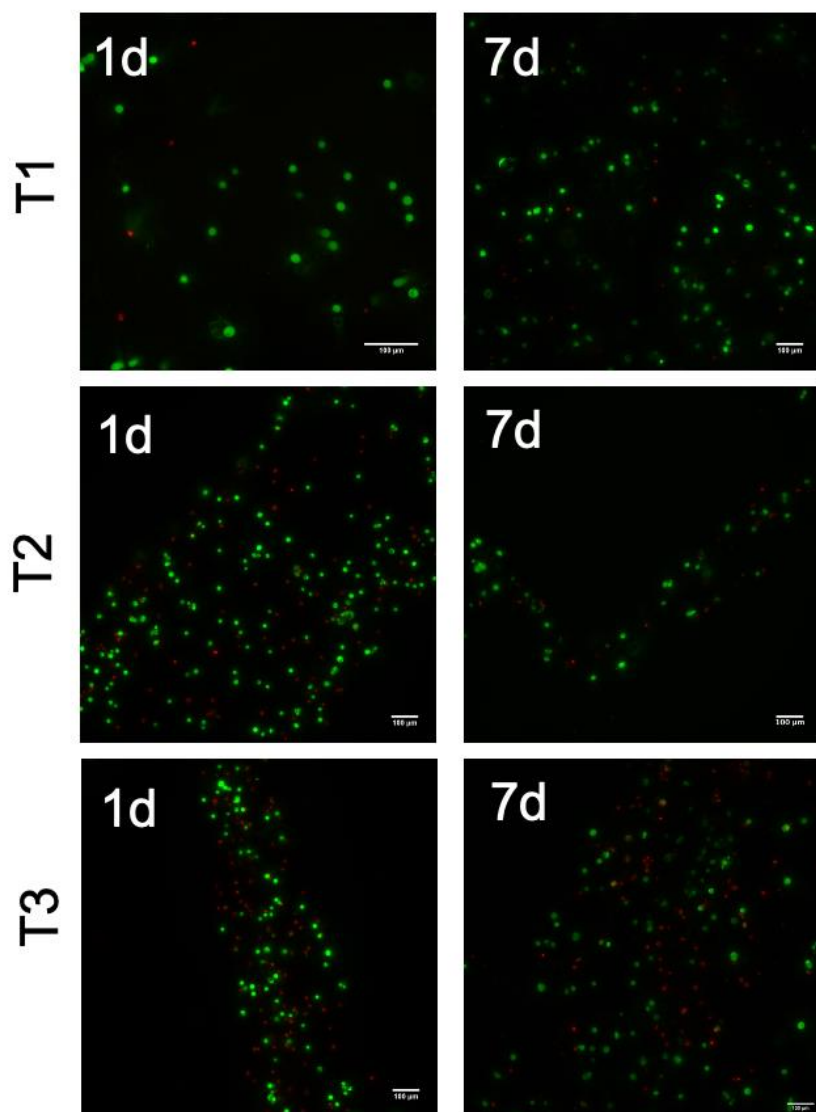

**Figure S2.** (A) MCF-7 viability in cell-laden TDM hydrogels bioprinted in the Pluronic F127 bed (10 mg/ml, 20 mg/mL and 30 mg/mL) and containing  $10^6$  cells/mL. Bioprinted hydrogels stained with a calcein AM/PI staining after 1 day or 7 days in culture. Viable cells in green and dead cells in red (scale bar: 100  $\mu$ m).

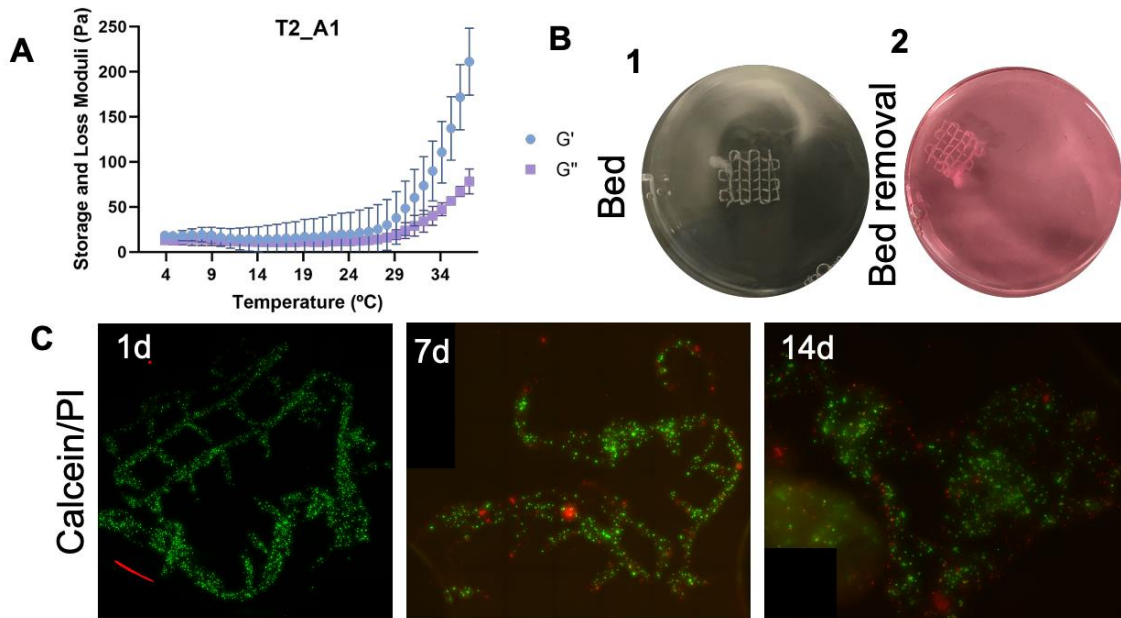

**Figure S3.** (A) Temperature sweep of bioink containing TDM at 20 mg/mL and alginate 1%. (B) Bioprinted MCF-7 laden scaffolds encapsulating  $10^6$  cells/mL. Hydrogels were bioprinted in a Pluronic F127 bed at 23% (1). Then, the bedding was removed with several washes of cold PBS (2). (C) MCF-7 viability over time in T2\_A1 hydrogels. Cell-laden hydrogels were stained with a calcein AM/Propidium iodide (PI) staining. Viable cells in green and dead cells in red.

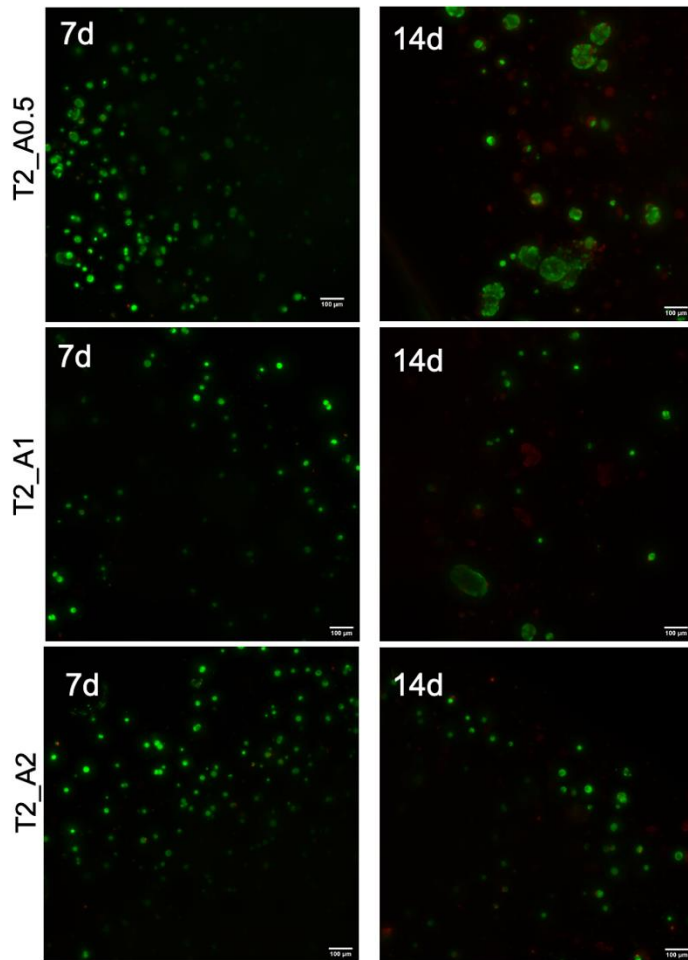

**Figure S4.** MCF-7 viability with a calcein AM/PI staining in hydrogels of TDM 20 mg/mL with alginate at 0.5%, 1% and 2% at day 7 and 14 (scale bar: 100 μm).

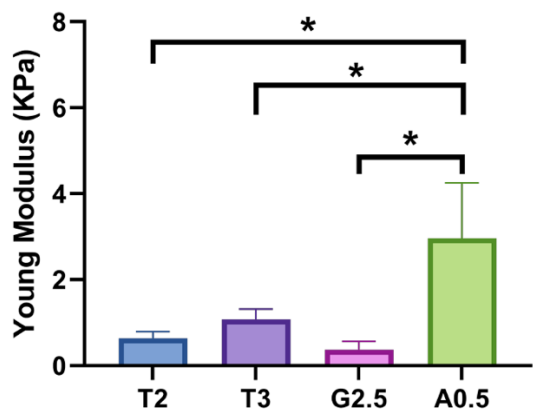

**Figure S5.** Young modulus of T2, T3, G2.5 and A0.5 hydrogels.

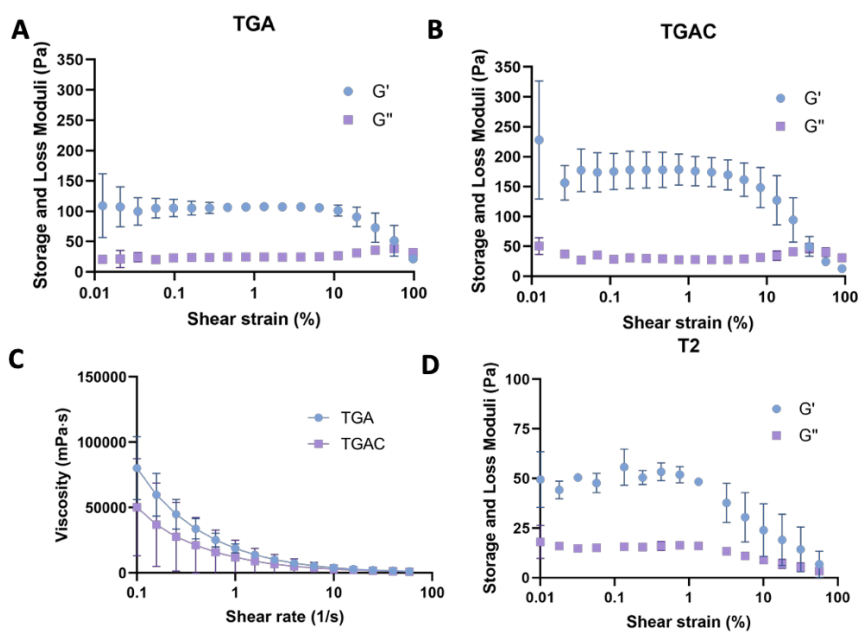

**Figure S6.** (A-B) Amplitude sweeps of TGA (A) and TGAC (B) at 8 °C. (C) Flow curve of TGA and TGAC at 8 °C. (D) Amplitude sweeps of T2 at 37 °C.

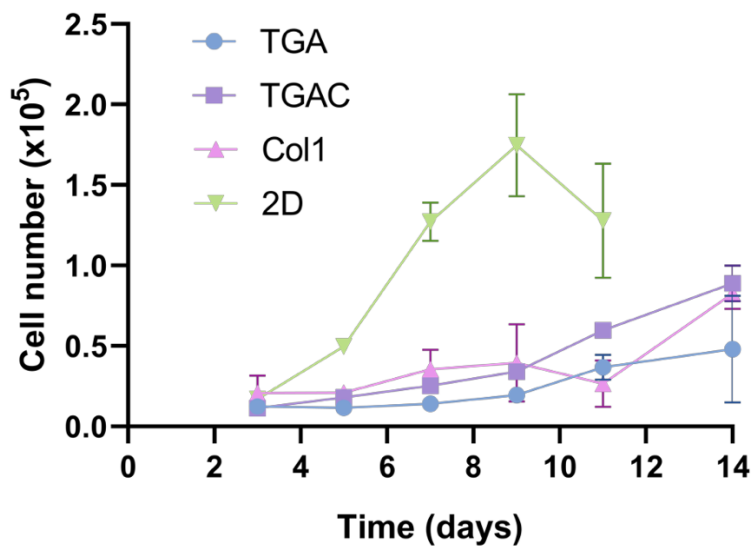

**Figure S7.** Cell proliferation, expressed in cell number, in the bioprinted TGA and TGAC hydrogels, non-bioprinted Col1 hydrogels and in 2D over time.

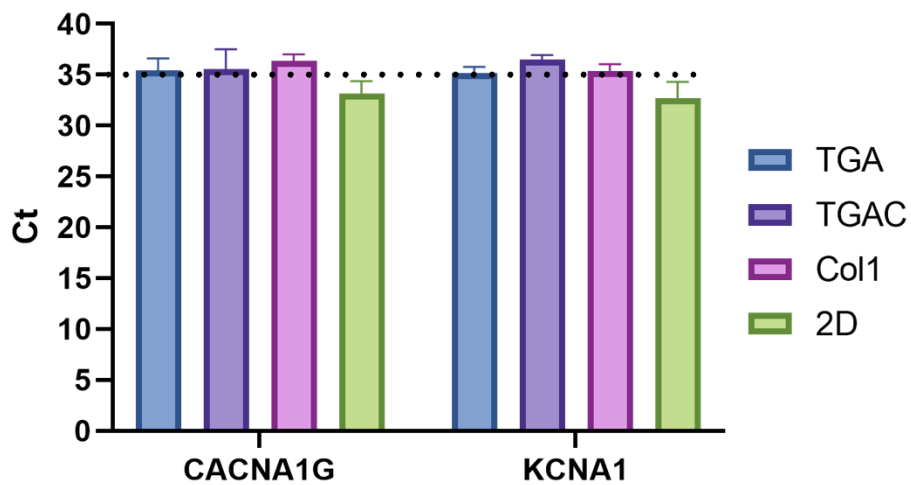

**Figure S8.** Ct values of CACNA1G and KCNA1 in MCF7 after 14 days in culture in TGA, TGAC and Col1 hydrogels or 9 days in 2D culture.
